# Supplementary material for: Effects of Low-Dose Non-Caloric Sweetener Consumption on Gut Microbiota in Mice
Source: PubMed Central journal article supplement (PMC5490539; doi:10.3390/nu9060560), 2017-06-01
Supplement: nutrients-09-00560-s001.pdf [file nutrients-09-00560-s001.pdf]

Supplementary Materials

Table S1. Oligonucleotide primer.

| Primer Name       | Sequence (5'-3')                          | Reference   |
|-------------------|-------------------------------------------|-------------|
| Eub338F           | ACTCCTACGGGAGGCAGCAG                      | [33]        |
| Eub518R           | ATTACCGCGGCTGCTGG                         |             |
| HDA1-GC-F         | CGCCCGGGGCGCGCCCCGGGGCGGGGCGGGGGCACGGGGGG | [34]        |
| HDA2-R            | ACTCCTACGGGAGGCAGCAGT                     |             |
| Bact934F          | GGARCATGTGGTTTAATTCGATGAT                 | [35]        |
| Bact1060R         | AGCTGACGACAACCATGCAG                      |             |
| Firm934F          | GGAGYATGTGGTTTAATTCGAAGCA                 | [35]        |
| Firm1060R         | AGCTGACGACAACCATGCAC                      |             |
| Lactobacillus-F   | AGCAGTAGGGAATCTTCCA                       | [36]        |
| Lactobacillus-R   | CACCGCTACACATGGAG                         |             |
| Clostridia.IV-F   | GCACAAGCAGTGGAGT                          | [37]        |
| Clostridia.IV-R   | CTTCCTCCGTTTTGTCAA                        |             |
| ClostridiaXIVa-F  | AAATGACGGTACCTGACTAA                      | [38]        |
| Clostridia.XIVa-R | CTTTGAGTTTCATTCTTGCGAA                    |             |
| Bacteroides-F     | GAGAGGAAGTCCCCCAC                         | [39]        |
| Bacteroides-R     | CGCTACTTGGCTGGTTCAG                       |             |
| mouse CYP8b1-F    | ACAAGCAGCAAGACCTGGAT                      | NM_010012.3 |
| mouse CYP8b1-R    | ATGGAAGAGACGCTGCAACT                      |             |
| mouse CYP7a1-F    | AAGTTTCGACATGCTCTCGC                      | NM_007824.2 |
| mouse CYP7a1-R    | CCTCATGGGAGCTGGAATTA                      |             |
| mouse 18s-F       | AAACGGCTACCACATCCAAG                      | NR_003278.3 |
| mouse 18s-R       | GGCCTCGAAAGAGTCCTGTA                      |             |

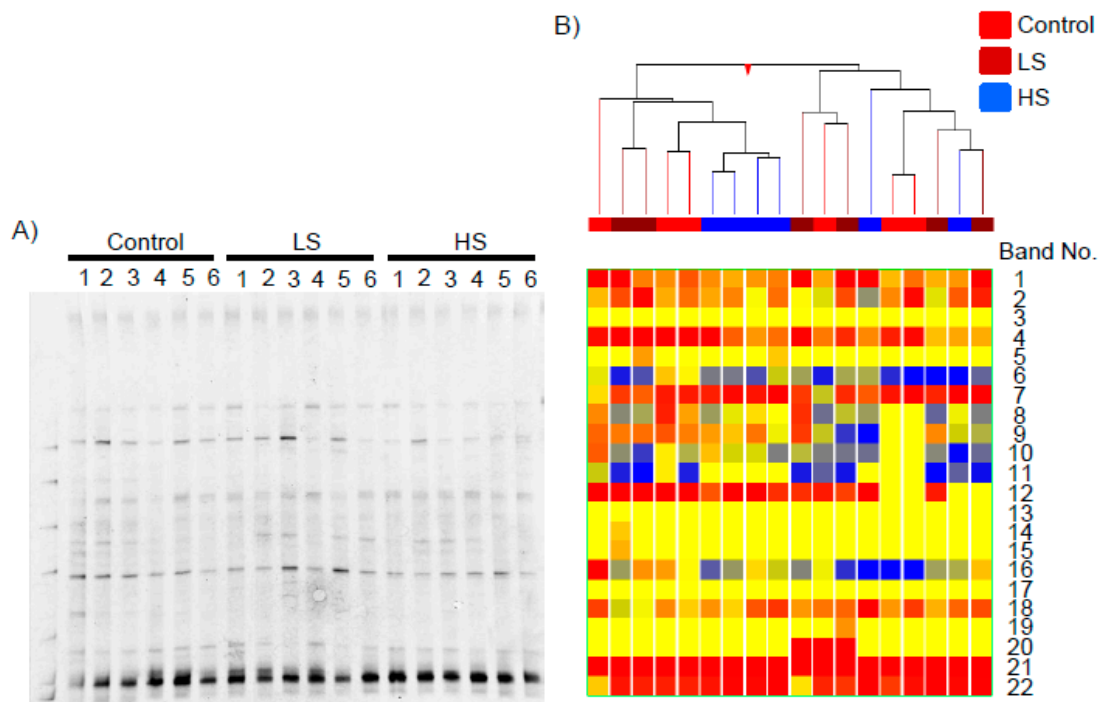

**Figure S1.** DGGE analysis of 16S V2-V3 rRNA in feces from mice fed sucralose. Band patterns (A) and hierarchical clustering of band patterns (B) for 16S V2-V3 rRNA in feces from mice fed sucralose for 8 weeks. LS: low sucralose (1.5 mg/kg BW/day), HS: high sucralose (15 mg/kg BW/day).

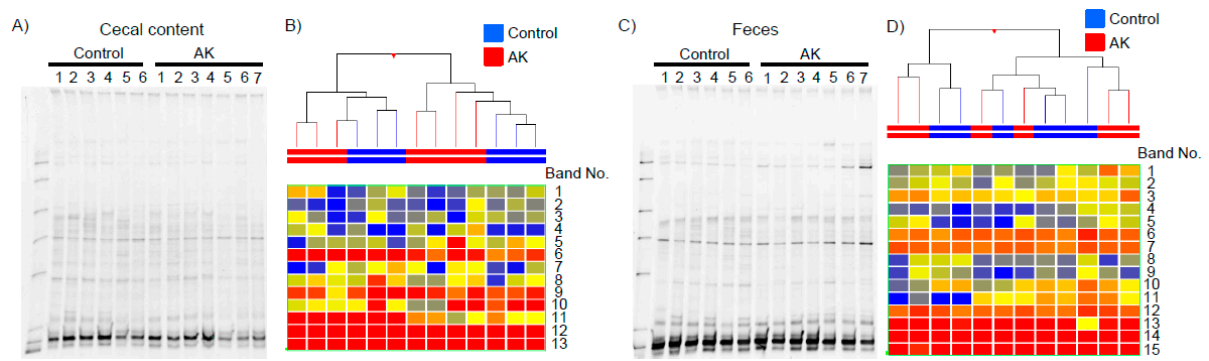

**Figure S2.** DGGE analysis of 16S V2-V3 rRNA in feces from mice fed acesulfame-K. Band patterns and hierarchical clustering of band patterns of 16S V2-V3 rRNA composition in cecal content (A) and feces (B) from mice fed acesulfame-K (AK) for 8 weeks.

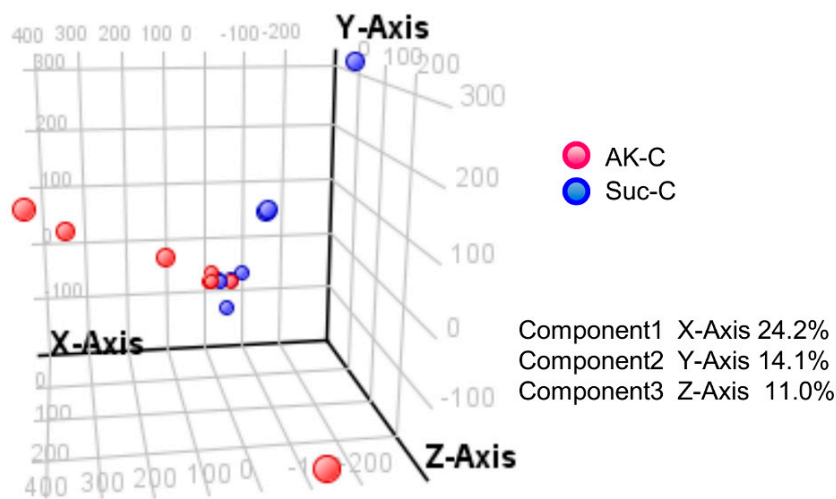

**Figure S3.** Luminal metabolome analysis in feces from both the control mice in Experiment 1 and 2. Principle component analysis of luminal metabolome data of the control groups from the sucralose experiment (Suc-C) and the acesulfam-K experiment (AK-C).
